# Supplementary material for: Circulating microRNAs are new and sensitive biomarkers of myocardial infarction
Source: PubMed Central journal article supplement — Eur Heart J. 2010 Jun 9;31(22):2765–73. doi: 10.1093/eurheartj/ehq167 (PMC2980809; doi:10.1093/eurheartj/ehq167), 2010-06-09
Supplement: supp_ehq167_ehq167supp_tables_1-3.pdf [file supp_ehq167_ehq167supp_tables_1-3.pdf]

## Supplementary Tables

**Table S1. Baseline characteristics. Group 1**

| VARIABLE                                              | CONTROL group | STEMi group 1 | P value    |
|-------------------------------------------------------|---------------|---------------|------------|
|                                                       | n = 17        | n = 25        | Vs Control |
| Age (years)                                           | 46.1 ± 13.9   | 57.9 ± 8.6    | 0.004      |
| Male sex %                                            | 76.5          | 96            | 0.140      |
| Hypertension %                                        | 17.6          | 76            | < 0.001    |
| Diabetes %                                            | 5.9           | 12            | 0.635      |
| Dyslipidemia %                                        | 11.8          | 32            | 0.060      |
| Smoking %                                             | 47            | 56            | 0.754      |
| Family history of CAD %                               | 17.6          | 0             | 0.060      |
| Symptoms onset to first blood sample collection (min) |               | 517 ± 309     |            |
| KILLIP score                                          |               | 1.7 ± 0.8     |            |
| EF* post PCI                                          |               | 39.5 ± 8      |            |

### Footnotes:

\* EF: Ejection Fraction

**Table S2 Inclusion criteria**

|                                         |
|-----------------------------------------|
| Signed Informed consent                 |
| Acute anterior STEMI * undergoing PCI   |
| Time symptom-to-ballon > 2 h and < 12 h |
| EF post PCI ≤ 45%                       |
| TIMI flow * > 2 post PCI                |

### Footnotes:

\* TIMI flow: Thrombolysis In Myocardial Infarction scoring system

**Table S3. STEMI patients characteristics. Group 2**

| VARIABLE                                              | CONTROL group | STEMI group 2 | P value    |
|-------------------------------------------------------|---------------|---------------|------------|
|                                                       | n = 17        | n = 8         | Vs Control |
| Age (years)                                           | 46.1 ± 13.9   | 61.9 ± 9      | 0.003      |
| Male sex %                                            | 76.5          | 87.5          | 0.915      |
| Hypertension %                                        | 17.6          | 37.5          | 0.156      |
| Diabetes %                                            | 5.9           | 25            | 0.231      |
| Dyslipidemia %                                        | 11.8          | 50            | 0.023      |
| Smoking %                                             | 47            | 37.5          | 0.986      |
| Family history of CAD %                               | 17.6          | 25            | 0.0672     |
| Symptoms onset to first blood sample collection (min) |               | 156 ± 72      |            |
| KILLIP score                                          |               | 1.4 ± 0.5     |            |
| EF* post PCI                                          |               | 40.8 ± 6.3    |            |
